# Supplementary material
Source: PubMed Central journal article supplement (PMC9802179)
Supplement: otaa018_suppl_supplementary_tables.pdf [file otaa018_suppl_supplementary_tables.pdf]

**Exploring the effects of cigarette smoking on inflammatory bowel disease: A Mendelian randomisation study**

## Contents

|                                                                                                                                                                                                                                      |               |
|--------------------------------------------------------------------------------------------------------------------------------------------------------------------------------------------------------------------------------------|---------------|
| Table S1. Regression Dilution $I^2_{GX}$ to test the suitability of instruments for MR Egger and the mF statistic as a test of instrument strength                                                                                   | <b>Page 3</b> |
| Table S2. Cochran's Q Tests of Heterogeneity                                                                                                                                                                                         | <b>Page 4</b> |
| Table S3. MR Egger Intercept test of directional horizontal pleiotropy                                                                                                                                                               | <b>Page 5</b> |
| Table S4. The number of SNPs from the genetic instrument that explain more of the variance in smoking behaviour than IBD according to Steiger directionality tests                                                                   | <b>Page 6</b> |
| Table S5. Association of rs1051730 genotype with smoking behaviours and demographic factors in a sample of 337,053 individuals from the UK Biobank                                                                                   | <b>Page 7</b> |
| Supplementary Table 6. Two-sample Mendelian randomisation analysis of the effect of genetic predisposition to smoking behaviours on risk of IBD and its subtypes using only SNPs that explain more variance in exposure than outcome | <b>Page 8</b> |

**Supplementary Table S1. Regression Dilution  $I^2_{GX}$  to test the suitability of instruments for MR Egger and the mF statistic as a test of instrument strength**

| Exposure           | Outcome            | mF    | $I^2$ Weighted $G_x$ | $I^2$ Unweighted $G_x$ |
|--------------------|--------------------|-------|----------------------|------------------------|
| Lifetime Smoking   | IBD                | 44.05 | 0.407                | 0.632                  |
|                    | Crohn's Disease    | 44.05 | 0.406                | 0.632                  |
|                    | Ulcerative Colitis | 44.05 | 0.410                | 0.632                  |
| Smoking Initiation | IBD                | 44.89 | 0.393                | 0.613                  |
|                    | Crohn's Disease    | 44.88 | 0.392                | 0.614                  |
|                    | Ulcerative Colitis | 44.82 | 0.400                | 0.620                  |

**Supplementary Table S2. Cochran's Q Tests of Heterogeneity**

| <b>Exposure</b>           | <b>Outcome</b>     | <b>IVW Q<br/>(Degrees of<br/>freedom)</b> | <b>IVQ Q<br/>P-value</b> |
|---------------------------|--------------------|-------------------------------------------|--------------------------|
| <b>Lifetime Smoking</b>   | IBD                | 271.63 (106)                              | <0.001                   |
|                           | Crohn's Disease    | 220.02 (106)                              | <0.001                   |
|                           | Ulcerative Colitis | 185.49 (106)                              | <0.001                   |
| <b>Smoking Initiation</b> | IBD                | 700.16 (324)                              | <0.001                   |
|                           | Crohn's Disease    | 612.26 (324)                              | <0.001                   |
|                           | Ulcerative Colitis | 544.20 (324)                              | <0.001                   |

**Supplementary Table S3. MR Egger Intercept test of directional horizontal pleiotropy**

| <b>Exposure</b>           | <b>Outcome</b>     | <b>MR Egger Intercept</b> | <b>Standard Error</b> | <b>P-value</b> |
|---------------------------|--------------------|---------------------------|-----------------------|----------------|
| <b>Lifetime Smoking</b>   | IBD                | 0.00617                   | 0.00865               | 0.48           |
|                           | Crohn's Disease    | 0.0122                    | 0.0100                | 0.22           |
|                           | Ulcerative Colitis | 0.00108                   | 0.00909               | 0.91           |
| <b>Smoking Initiation</b> | IBD                | 0.00504                   | 0.00471               | 0.29           |
|                           | Crohn's Disease    | 0.00576                   | 0.00569               | 0.31           |
|                           | Ulcerative Colitis | 0.00486                   | 0.00528               | 0.36           |

**Supplementary Table S4. The number of SNPs from the genetic instrument that explain more of the variance in smoking behaviour than IBD according to Steiger directionality tests**

| <b>Exposure</b>    | <b>Outcome</b>     | <b>True (%)</b> | <b>False</b> |
|--------------------|--------------------|-----------------|--------------|
| Lifetime Smoking   | IBD                | 115 (92.0)      | 10           |
|                    | Crohn's disease    | 108 (86.4)      | 17           |
|                    | Ulcerative Colitis | 112 (89.6)      | 13           |
| Smoking Initiation | IBD                | 357 (95.5)      | 17           |
|                    | Crohn's disease    | 352 (94.4)      | 21           |
|                    | Ulcerative Colitis | 354 (94.6)      | 20           |

**Supplementary Table 5. Association of rs1051730 genotype with smoking behaviours and demographic factors in a sample of 337,053 individuals from the UK Biobank**

|                                 | Never smokers |        |        |         | Ever smokers |        |        |         |
|---------------------------------|---------------|--------|--------|---------|--------------|--------|--------|---------|
|                                 | 0             | 1      | 2      | p-value | 0            | 1      | 2      | p-value |
| Study sample (n)                | 82,130        | 81,580 | 20,334 |         | 68,562       | 66,953 | 16,307 |         |
| Cigarettes per day              |               |        |        |         | 14.88        | 15.89  | 16.72  | <0.001  |
| Smoking status (%) <sup>a</sup> |               |        |        |         |              |        |        |         |
| Current                         |               |        |        |         | 22           | 22     | 22     |         |
| Former                          |               |        |        |         | 78           | 78     | 78     | 0.057   |
| Men (%)                         | 42            | 41     | 41     | 0.121   | 52           | 52     | 52     | 0.539   |
| Age (mean)                      | 56.1          | 56.2   | 56.2   | 0.092   | 57.8         | 57.7   | 57.6   | 0.002   |
| Education (%)                   |               |        |        |         |              |        |        |         |
| Primary                         | 14            | 14     | 14     |         | 21           | 21     | 20     |         |
| Secondary                       | 51            | 50     | 50     |         | 51           | 52     | 52     |         |
| Tertiary                        | 36            | 36     | 36     | 0.776   | 27           | 27     | 28     | 0.020   |
| Missing (n)                     | 683           | 704    | 202    |         | 634          | 685    | 133    |         |
| Alcohol intake (%)              |               |        |        |         |              |        |        |         |
| Never                           | 7             | 7      | 7      |         | 5            | 6      | 6      |         |
| Special occasions               | 11            | 12     | 11     |         | 9            | 9      | 9      |         |
| Monthly                         | 12            | 13     | 12     |         | 9            | 10     | 10     |         |
| Weekly                          | 53            | 52     | 53     |         | 49           | 48     | 47     |         |
| Daily/almost daily              | 16            | 16     | 16     | 0.161   | 28           | 28     | 28     | 0.074   |
| Missing (n)                     | 33            | 47     | 16     |         | 47           | 55     | 13     |         |
| Diagnosis of IBD (%)            | 0.92          | 0.86   | 0.82   | 0.270   | 1.26         | 1.42   | 1.31   | 0.040   |
| Diagnosis of UC (%)             | 0.66          | 0.60   | 0.59   | 0.243   | 0.86         | 1.01   | 1.00   | 0.014   |

|                         |      |      |      |       |      |      |      |       |
|-------------------------|------|------|------|-------|------|------|------|-------|
| Diagnosis of Crohns (%) | 0.34 | 0.34 | 0.30 | 0.635 | 0.51 | 0.52 | 0.42 | 0.265 |
|-------------------------|------|------|------|-------|------|------|------|-------|

---



**Supplementary Table 6. Two-sample Mendelian randomisation analysis of the effect of genetic predisposition to smoking behaviours on risk of IBD and its subtypes using only SNPs that explain more variance in exposure than outcome**

| <b>Exposure</b>           | <b>Outcome</b>         | <b>MR Method</b>          | <b>OR (95% CI)</b> | <b>P-value</b> |
|---------------------------|------------------------|---------------------------|--------------------|----------------|
| <b>Smoking Initiation</b> | <b>IBD</b>             | Inverse Variance Weighted | 1.03 (0.93-1.13)   | 0.60           |
|                           |                        | MR Egger                  | 0.91 (0.60-1.37)   | 0.65           |
|                           |                        | Weighted Median           | 1.03 (0.91-1.18)   | 0.61           |
|                           |                        | Weighted Mode             | 0.99 (0.70-1.41)   | 0.96           |
|                           | <b>Crohn's Disease</b> | Inverse Variance Weighted | 1.08 (0.96-1.21)   | 0.21           |
|                           |                        | MR Egger                  | 0.74 (0.45-1.21)   | 0.23           |
|                           |                        | Weighted Median           | 1.07 (0.91-1.26)   | 0.41           |
|                           |                        | Weighted Mode             | 1.20 (0.71-2.02)   | 0.50           |
|                           | <b>UC</b>              | Inverse Variance Weighted | 0.99 (0.88-1.11)   | 0.85           |
|                           |                        | MR Egger                  | 0.85 (0.54-1.34)   | 0.48           |
|                           |                        | Weighted Median           | 1.08 (0.93-1.27)   | 0.31           |
|                           |                        | Weighted Mode             | 1.17 (0.71-1.94)   | 0.53           |
| <b>Lifetime Smoking</b>   | <b>IBD</b>             | Inverse Variance Weighted | 1.01 (0.80-1.27)   | 0.94           |
|                           |                        | MR Egger                  | 0.58 (0.23-1.42)   | 0.23           |
|                           |                        | Weighted Median           | 1.01 (0.76-1.36)   | 0.93           |
|                           |                        | Weighted Mode             | 1.10 (0.59-2.03)   | 0.77           |
|                           | <b>Crohn's Disease</b> | Inverse Variance Weighted | 1.13 (0.87-1.46)   | 0.36           |
|                           |                        | MR Egger                  | 0.68 (0.25-1.83)   | 0.45           |
|                           |                        | Weighted Median           | 1.36 (0.94-1.97)   | 0.10           |
|                           |                        | Weighted Mode             | 1.60 (0.63-4.05)   | 0.32           |

|                           |                           |                  |      |
|---------------------------|---------------------------|------------------|------|
| <b>Ulcerative Colitis</b> | Inverse Variance Weighted | 0.90 (0.70-1.15) | 0.41 |
|                           | MR Egger                  | 1.17 (0.44-3.14) | 0.75 |
|                           | Weighted Median           | 0.98 (0.69-1.40) | 0.91 |
|                           | Weighted Mode             | 1.59 (0.62-4.12) | 0.34 |
